# Supplementary material for: Inverse Association between Dietary Iron Intake and Gastric Cancer: A Pooled Analysis of Case-Control Studies of the Stop Consortium
Source: MDPI journal article supplement (doi:10.3390/nu14122555), 2022-06-20
Supplement: s1 [file s1]

**Supplementary Table S1.** Selected characteristics of the studies included in the pooled analysis.

| Reference                            | Area, country         | Study period | Cases (n) | Controls (n) | Study design       |
|--------------------------------------|-----------------------|--------------|-----------|--------------|--------------------|
| Lucenteforte et al., 2008 [16]       | Milan, Italy          | 1997-2007    | 230       | 547          | Hospital-based     |
| Pakseresht et al., 2011 [17]         | Ardabil, Iran         | 2005-2007    | 286       | 304          | Population-based   |
| Lunet et al., 2007 [18]              | Porto, Portugal       | 1999-2006    | 692       | 1667         | Population-based   |
| Castano-Vinyals et al., 2015 [19]    | 10 provinces, Spain   | 2008-2012    | 441       | 3440         | Population-based   |
| Santibanez et al., 2012 [20]         | Valencia, Spain       | 1995-1999    | 401       | 455          | Hospital-based     |
| Hernandez -Ramirez et al., 2009 [21] | Mexico City, 1 Mexico | 2004-2005    | 248       | 478          | Population-based   |
| Lopez-Carrillo et al., 1999 [22]     | Mexico City 2, Mexico | 1989-1990    | 220       | 752          | Population-based   |
| Lopez-Carrillo et al., 2003 [23]     | 3 areas, Mexico       | 1994-1996    | 234       | 468          | Hospital-based     |
| Machida-Montani et al., 2004 [24]    | Nagano, Japan         | 1998-2002    | 153       | 303          | Hospital-based     |
| Ward et al., 1997 [25]               | Nebraska, USA         | 1988-1993    | 170       | 502          | Population-based   |
| Schatzkin et al., 2001 [26]          | 6 States, USA         | 1995-1996    | 1583      | 3331         | Nested in a cohort |

**Supplementary Table S2.** Odds ratio of GC for quartiles of dietary iron intake, excluding one study at a time.

| Study excluded        | Dietary iron intake (quartile) | OR   | 95% CI      |
|-----------------------|--------------------------------|------|-------------|
| Milan, Italy          | Q1                             | Ref  |             |
|                       | Q2                             | 0.87 | (0.76-0.98) |
|                       | Q3                             | 0.82 | (0.71-0.95) |
|                       | Q4                             | 0.66 | (0.56-0.78) |
| Ardabil, Iran         | Q1                             | Ref  |             |
|                       | Q2                             | 0.90 | (0.80-1.02) |
|                       | Q3                             | 0.88 | (0.76-1.02) |
|                       | Q4                             | 0.73 | (0.61-0.87) |
| Porto, Portugal       | Q1                             | Ref  |             |
|                       | Q2                             | 0.87 | (0.77-0.99) |
|                       | Q3                             | 0.83 | (0.71-0.96) |
|                       | Q4                             | 0.66 | (0.56-0.79) |
| 10 provinces, Spain   | Q1                             | Ref  |             |
|                       | Q2                             | 0.85 | (0.75-0.97) |
|                       | Q3                             | 0.78 | (0.67-0.91) |
|                       | Q4                             | 0.65 | (0.55-0.77) |
| Valencia, Spain       | Q1                             | Ref  |             |
|                       | Q2                             | 0.91 | (0.80-1.03) |
|                       | Q3                             | 0.81 | (0.70-0.94) |
|                       | Q4                             | 0.65 | (0.55-0.77) |
| Mexico City, 1 Mexico | Q1                             | Ref  |             |
|                       | Q2                             | 0.91 | (0.81-1.04) |
|                       | Q3                             | 0.89 | (0.77-1.03) |
|                       | Q4                             | 0.68 | (0.56-0.79) |
| Mexico City 2, Mexico | Q1                             | Ref  |             |
|                       | Q2                             | 0.88 | (0.77-0.99) |
|                       | Q3                             | 0.82 | (0.71-0.94) |
|                       | Q4                             | 0.67 | (0.57-0.80) |
| 3 areas, Mexico       | Q1                             | Ref  |             |
|                       | Q2                             | 0.86 | (0.76-0.98) |
|                       | Q3                             | 0.81 | (0.70-0.94) |
|                       | Q4                             | 0.64 | (0.54-0.76) |
| Nagano, Japan         | Q1                             | Ref  |             |
|                       | Q2                             | 0.88 | (0.77-1.00) |
|                       | Q3                             | 0.82 | (0.71-0.95) |
|                       | Q4                             | 0.66 | (0.56-0.79) |
| Nebraska, USA         | Q1                             | Ref  |             |
|                       | Q2                             | 0.88 | (0.77-0.99) |
|                       | Q3                             | 0.81 | (0.70-0.93) |
|                       | Q4                             | 0.65 | (0.55-0.77) |
| 6 States, USA         | Q1                             | Ref  |             |
|                       | Q2                             | 0.83 | (0.71-0.97) |
|                       | Q3                             | 0.78 | (0.65-0.94) |

|    |      |             |
|----|------|-------------|
| Q4 | 0.63 | (0.50-0.79) |
|----|------|-------------|

---

OR, Odds ratio, adjusted for study, sex, age, smoking status, socioeconomic status, caloric intake, salt intake  
CI, confidence interval; Q, quartile ; Ref, reference category

**Supplementary Table S3:** Results of the analyses stratified by sex, caloric intake and tobacco smoking

| Stratification by                    | Total dietary iron<br>OR (95% CI) |                  |                  |                  |                       |
|--------------------------------------|-----------------------------------|------------------|------------------|------------------|-----------------------|
|                                      | Q1                                | Q2               | Q3               | Q4               | One quartile increase |
| <b>Sex*</b>                          |                                   |                  |                  |                  |                       |
| Male                                 | Ref                               | 0.83 (0.71-0.97) | 0.76 (0.64-0.91) | 0.60 (0.49-0.74) | 0.85 (0.80-0.91)      |
| Female                               | Ref                               | 0.93 (0.77-1.13) | 0.89 (0.70-1.13) | 0.77 (0.57-1.04) | 0.92 (0.84-1.02)      |
| <b>Calories intake (quartiles)**</b> |                                   |                  |                  |                  |                       |
| Q1                                   | Ref                               | 1.06 (0.87-1.29) | 0.91 (0.68-1.22) | 0.81 (0.46-1.42) | 0.97 (0.86-1.08)      |
| Q2                                   | Ref                               | 0.92 (0.74-1.14) | 0.88 (0.69-1.13) | 0.84 (0.61-1.16) | 0.95 (0.86-1.04)      |
| Q3                                   | Ref                               | 0.73 (0.51-1.04) | 0.77 (0.54-1.12) | 0.53 (0.36-0.79) | 0.85 (0.76-0.94)      |
| Q4                                   | Ref                               | 0.82 (0.42-1.60) | 0.55 (0.29-1.03) | 0.45 (0.24-0.84) | 0.77 (0.68-0.88)      |
| <b>Tobacco smoking***</b>            |                                   |                  |                  |                  |                       |
| Never                                | Ref                               | 0.96 (0.80-1.16) | 0.91 (0.73-1.13) | 0.80 (0.62-1.04) | 0.93 (0.86-1.01)      |
| Former                               | Ref                               | 0.88 (0.71-1.08) | 0.88 (0.70-1.10) | 0.75 (0.58-0.97) | 0.92 (0.84-1.00)      |
| Current                              | Ref                               | 0.77 (0.58-1.03) | 0.64 (0.46-0.90) | 0.41 (0.27-0.61) | 0.75 (0.66-0.85)      |

\* OR, Odds ratios, adjusted for study, age, smoking status, socioeconomic status, calorie intake, salt intake

\*\* OR, Odds ratios, adjusted for study, sex, age, smoking status, socioeconomic status, salt intake

\*\*\* OR, Odds ratios, adjusted for study, sex, age, socioeconomic status, calorie intake, salt intake  
CI, confidence interval; Q, quartile; Ref, reference category
